# Supplementary material for: Territories of Faith: 1000 Years of Landscape Multifunctionality in Santa Mariña de Augas Santas (NW Spain)
Source: MDPI journal article supplement (doi:10.3390/land10090992), 2021-09-21

Figure OSL.1. OSL decay curve of the natural and regenerated signals of a small quartz multi-grain aliquot of sample SM3-01. Inset: dose response curve of the same aliquot with interpolated equivalent dose.

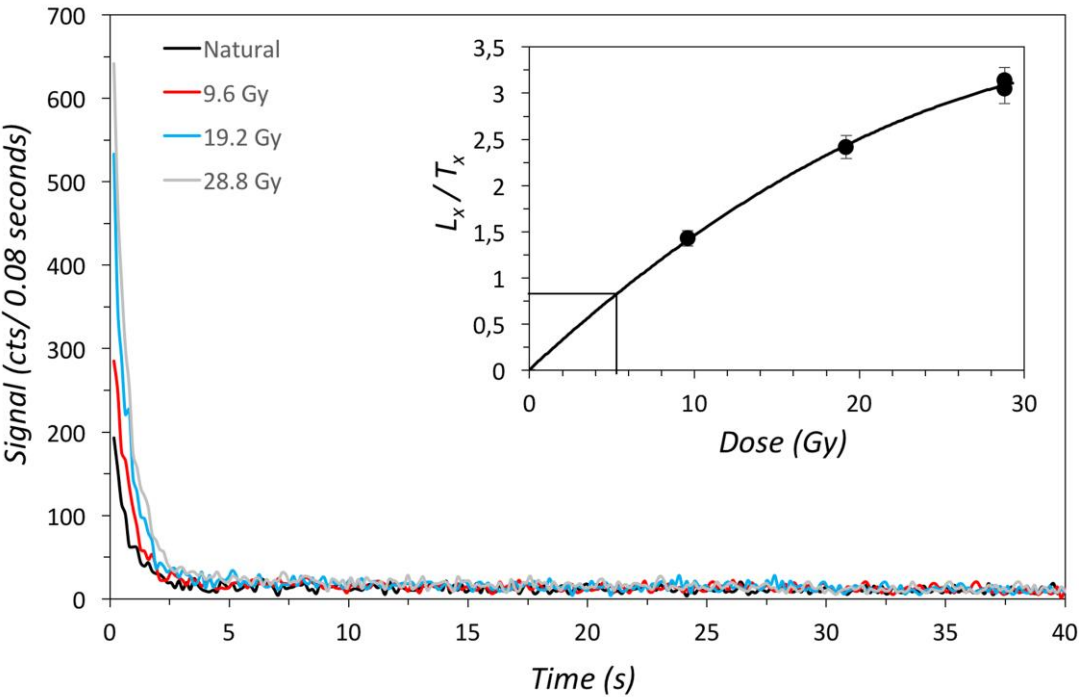

Figure OSL.2. Distribution of equivalent dose obtained for quartz small multi-grain aliquots of the studied samples. In the left column, radial-plots are displayed with the Central Age values marked in grey (for the sample SM3-23, the Minimum Age is also marked with a line). In the central column, the histograms of the same distributions are displayed. The right column shows the kernel density estimate plots.

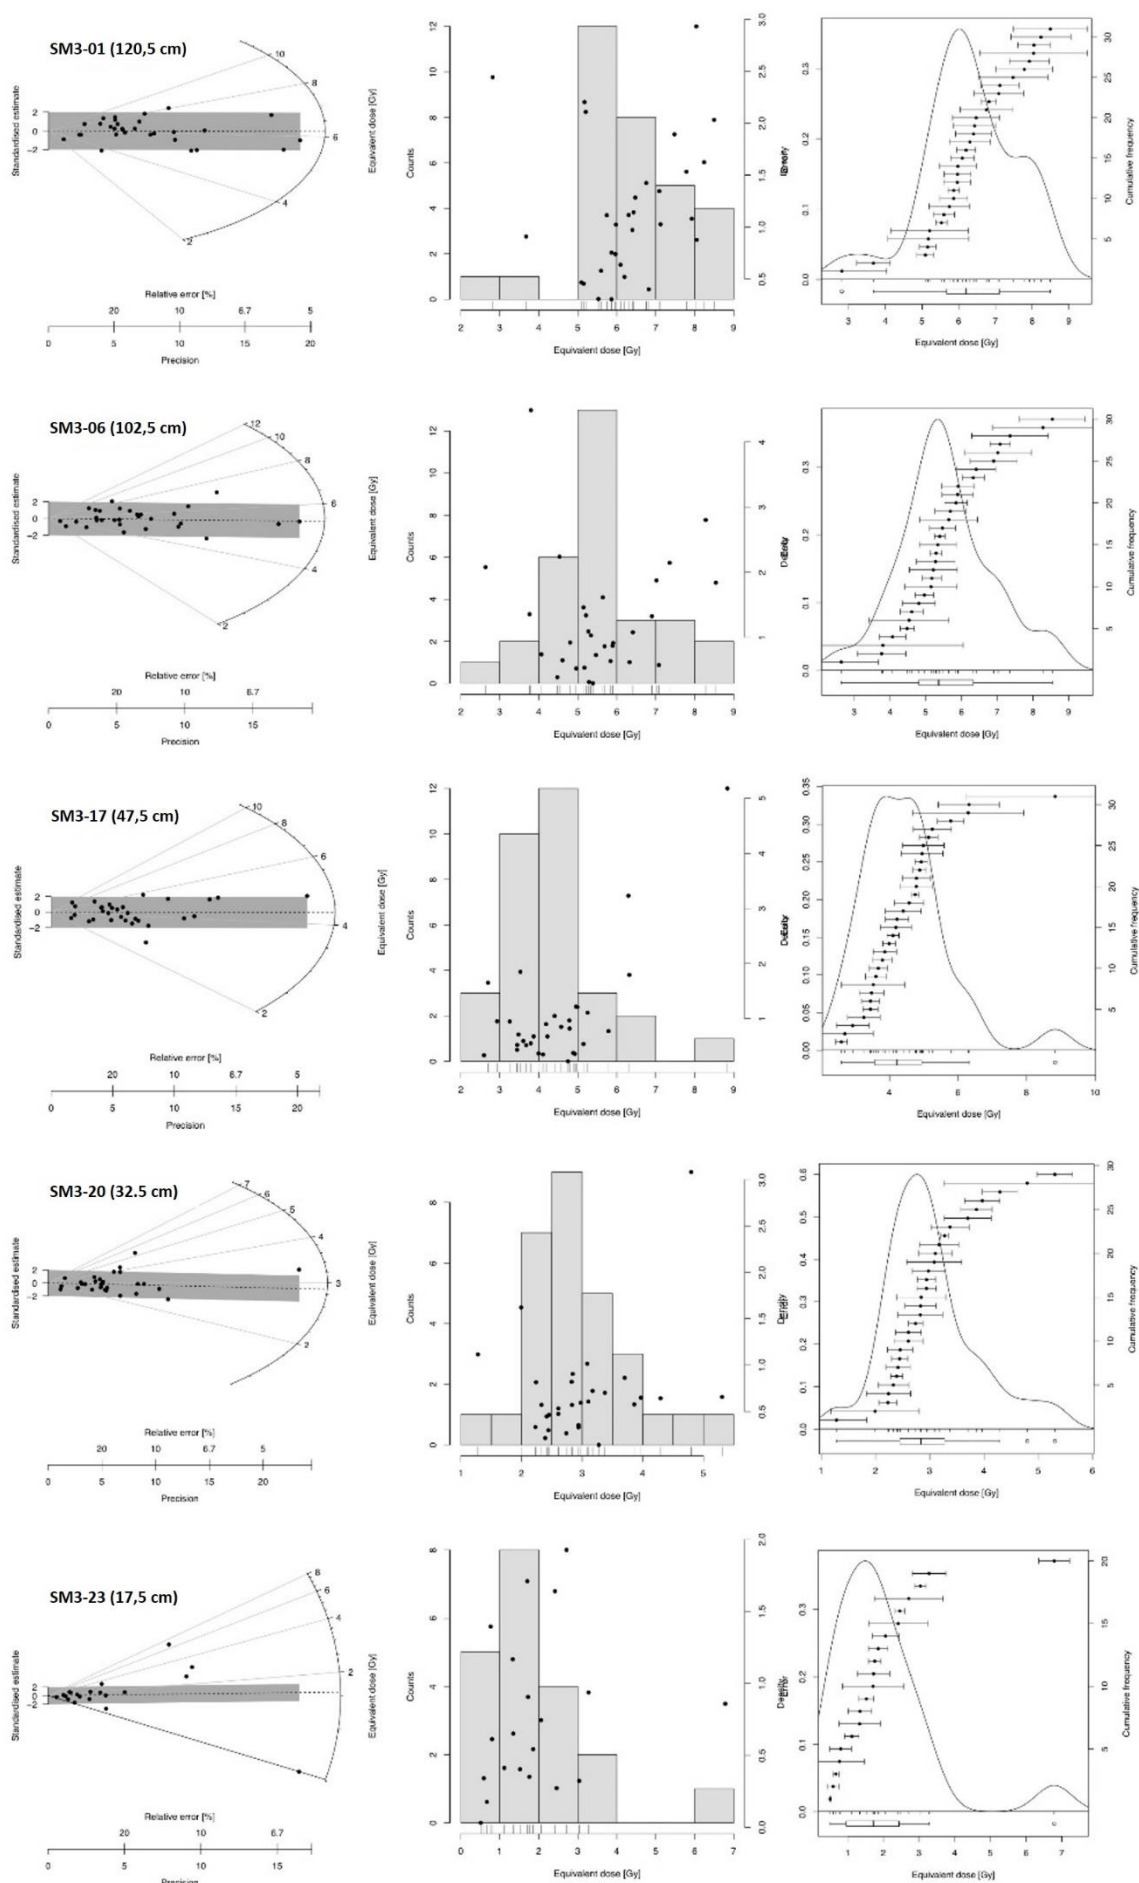

Supplement: s1 [file s1]
